# Supplementary material
Source: HighWire-hosted journal article supplement (https://erj.ersjournals.com/content/58/1/2100130)

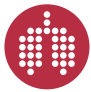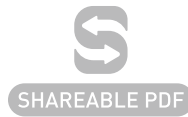

# Inhaled corticosteroids downregulate SARS-CoV-2-related genes in COPD: results from a randomised controlled trial

Stephen Milne <sup>1,2,3,6</sup>, Xuan Li<sup>1,6</sup>, Chen Xi Yang <sup>1</sup>, Fernando Sergio Leitao Filho<sup>1,2</sup>, Ana I. Hernández Cordero <sup>1</sup>, Cheng Wei Tony Yang <sup>1,4</sup>, Tawimas Shaipanich<sup>2</sup>, Stephan F. van Eeden<sup>1,2</sup>, Janice M. Leung<sup>1,2</sup>, Stephen Lam<sup>2,5</sup> and Don D. Sin<sup>1,2</sup>

<sup>1</sup>Centre for Heart Lung Innovation, St Paul's Hospital, University of British Columbia, Vancouver, BC, Canada. <sup>2</sup>Division of Respiratory Medicine, University of British Columbia, Vancouver, BC, Canada. <sup>3</sup>Faculty of Medicine and Health, University of Sydney, Sydney, Australia. <sup>4</sup>Providence Airway Centre, Vancouver, BC, Canada. <sup>5</sup>Dept of Integrative Oncology, BC Cancer Research Centre, Vancouver, BC, Canada. <sup>6</sup>Both authors contributed equally to the work.

Stephen Milne ([stephen.milne@hli.ubc.ca](mailto:stephen.milne@hli.ubc.ca))

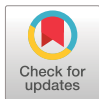

Shareable abstract (@ERSpublications)

In a RCT of 63 patients with COPD, 12 weeks of ICS/LABA therapy downregulated bronchial epithelial expression of the SARS-CoV-2-related genes *ACE2* and *ADAM17* compared to LABA alone. This may have implications for COVID-19 susceptibility/severity in COPD. <https://bit.ly/3vZnBVO>

**Cite this article as:** Milne S, Li X, Yang CX, *et al.* Inhaled corticosteroids downregulate SARS-CoV-2-related genes in COPD: results from a randomised controlled trial. *Eur Respir J* 2021; 58: 2100130 [DOI: 10.1183/13993003.00130-2021].

This single-page version can be shared freely online.

Copyright ©The authors 2021.

This version is distributed under the terms of the Creative Commons Attribution Non-Commercial Licence 4.0. For commercial reproduction rights and permissions contact [permissions@ersnet.org](mailto:permissions@ersnet.org)

Received: 14 Jan 2021  
Accepted: 21 March 2021

*To the Editor:*

Observational studies show that COPD is associated with increased coronavirus disease 2019 (COVID-19) severity and mortality [1]. Inhaled corticosteroids (ICS), which are commonly used to treat COPD, have been associated with increased risk of bacterial pneumonia in COPD and impaired immune response to viruses. Whether this class of medication affects the airway expression of severe acute respiratory syndrome coronavirus 2 (SARS-CoV-2) receptors and cofactors (changes which may modify COVID-19 susceptibility and outcomes) is currently unclear. Therefore, we examined the effects of ICS treatment on SARS-CoV-2-related gene expression in lower airway bronchial epithelial cells (BECs) in a randomised controlled trial of COPD patients.

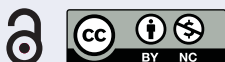

Supplement: inline-supplementary-material-1 [file inline-supplementary-material-1.pdf]
